# Supplementary material for: Effects of lithium perchlorate on the nucleation and crystallization of poly(ethylene oxide) and poly(ε-caprolactone) in the poly(ethylene oxide)–poly(ε-caprolactone)–lithium perchlorate ternary blend
Source: Royal Society of Chemistry journal article supplement (doi:10.1039/c3ce41715h), 2013-10-31
Supplement: c3ce41715h.pdf [file c3ce41715h.pdf]

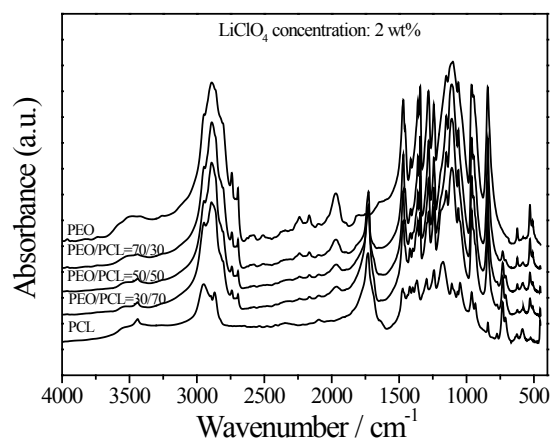

Fig S1. Infrared spectra for PEO/PCL/LiClO<sub>4</sub> ternary blend with different PEO/PCL ratios, the concentration of LiClO<sub>4</sub> is fixed at 2 wt%.

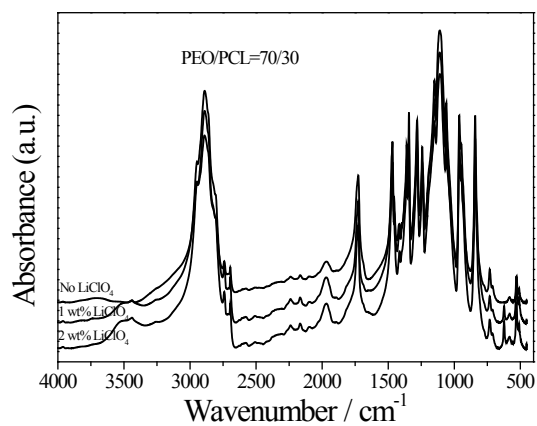

Fig S2. Infrared spectra for PEO/PCL/LiClO<sub>4</sub> ternary blend with PEO/PCL=70/30, the concentration of LiClO<sub>4</sub> changes from 0 to 2 wt%.
